# Supplementary material for: Phylogenomics and Systematics of Overlooked Mesoamerican and South American Polyploid Broad-Leaved Festuca Grasses Differentiate F. sects. Glabricarpae and Ruprechtia and F. subgen. Asperifolia, Erosiflorae, Mallopetalon and Coironhuecu (subgen. nov.)
Source: MDPI journal article supplement (doi:10.3390/plants11172303), 2022-09-02
Supplement: s1 [file s1]

**Supplementary File S1.** List of 65 specimens examined taxonomically of the species under study [*Festuca* subgen. *Erosiflorae*, *F.* subgen. *Drymanthele* sect. *Ruprechtia*, *F.* subgen. *Subulatae* sect. *Glabricarpae*, *F.* subgen. *Asperifolia* and *F.* subgen. *Mallopetalon* sensu Alexeev, plus the newly described *F.* subgen. *Coironhuecu* subgen. nov. (*F. argentina*) and *F.* subgen. *Drymanthele* sensu lato (*F. superba*)], ranked in alphabetical order.

***Festuca amplissima* Rupr.** MEXICO. México: 3.1 mi SE Plan de Vegas [Vigas], 11 October 2001, Peterson P.M. 16150 & Herrera-Arrieta Y. (US). ***Festuca argentina* (Speg.) Parodi.** ARGENTINA. Chubut: Escalante, Canadon Pilar, Estancia Los Manantiales, 60 km N of Comodoro Rivadavia; 24 December 1938, Eyerdam W. J. s.n., Beetle A.A., Grondona E. (SI). Neuquén: Ruta 237, next to Estancia La Lonja, 28 November 1963, Vallerini J. 376 (SI). Río Negro: Bariloche, río Lemay, 19 February 2010, Catalán P. s.n. (UZ); Pilcaniyeu, 20 km al S de Paso Flores, 10 December 1981, Cabrera A.L. 33017 with Botta S., Ezcurra C. & Kiesling R. (SI). Santa Cruz: Lago Argentino, south shore near Calafate, 10 January 1939, Eyerdam W. J. s.n. with Beetle A.A. & Grondona E. (SI). San Julian and [unreadable], 1915, Carette E. 15 (SI). Catalán, P., no Lemey, 19 febr 2010, (UZ). ***Festuca asperella* E.B. Alexeev.** MEXICO. México: Along Hwy. 95, south of Mexico City, just S of El Gordo, 21 August 1972, Dziekanowski C. T, Dunn D. B. & Bolingbroke 2022 (MO, isotype). ***Festuca breviglumis* Swallen.** MEXICO. Jalisco: 11.7 mi SW of Ciudad Guzman, 5 October 2001, Peterson P.M. & Rosales O. 16078 (US); 6.3 mi SW of Mazamitla along Hwy 110 towards Colima, 7 October 2001, Peterson P. M. & Rosales O. 16117 (US). ***Festuca caldasii* (Kunth) Kunth.** ECUADOR. Chimborazo: Sipambe - Huigra ca km 10, 16 June 1999, Laegaard S. 20405 (AAU). Loja: Catacocha - La Toma km 28, 29 April 1992, Laegaard S. 102535 (AAU); Km 6 above Jimbura along Zumba road, 27 March 1994, Laegaard S. 105256 (AAU); Catamayo, Chinchas-Tambara, fecha, colectores Moreno-Aguilar M. F. F98\_iii, Medina I. & Cango G. (HUTPL). ***Festuca carrascani* Stančík & Renvoize.** BOLIVIA. Cochabamba: José Carrasco Torrico, 10-15 km south of Totora along the road to Aiquile, 1 March 2005, Wood J. R. I. 21684 & Haigh A. (LPB, isotype). ***Festuca chiriquensis* Swallen.** PANAMA. Chiriqui: Chiriqui volcano, 29-30 September 1911, Hitchcock A. S. 8197 (US, holotype). ***Festuca chuquisacae* Stančík & Renvoize.** BOLIVIA. Chuquisaca: Tipoyo, cerro Obispo-San Juan, 24 April 1994, Wood J. R. I. 8337 (LPB, isotype). ***Festuca dentiflora* E.B. Alexeev ex Stančík & P.M. Peterson.** PERU. Huanuco: Baños, 1838, Wilkes Explor. Exped. 5 (US, holotype). ***Festuca dichoclada* Pilg.** PERU. Ancash: Huascarán National park, Quebrada Llaca, 24 May 1985, Smith N. 10782 (AAU). Cajamarca: Sais, José Carlos Mariátegui, km 20-40 on Suchubamba-San Juan road, 5 June 1984, Smith D. N. 7534 & Sánchez-Vega I. (MO). ***Festuca fimbriata* Nees.** ARGENTINA. Corrientes: Santo Tome, Arroyo Chimiray and Ruta 40, 8 October 1976, Quarín 3409 (CTES); Garruchos, 22 October 1954, Buikart A. 19659 (BAA, SI); estancia "Garruchos", 1 November 1950 Pedersen T. M. 819 (C, K, MO); Ruta 37, 5 km E of Gobernador Virasoro, 14 November 1974, Schini A. & Carnevali R. C. 10523 (SI, US); Timbo, costa Río Uruguay, 26 km SE of Colina Garabi, 16 September 1980, Ahumado & Schinini 4085 (CTES). Misiones: Apóstoles, Est. Agrotécnica, October 1977, Cabrera A. 28766, Botta S. M., Kiesling R., Rotman A. D., Tur N. & Zuloaga F. O. (SI); Ruta Prov. 40 and Ayo. Chimiray, 16 October 2000, Zuloaga F. O. & Morrone O. 7155 (SI); Capital, Ruta provinc. no. 1, 12 km S of Posadas, 16 November 1974, Schinini & Carnevali 10687 (CTES). ***Festuca horridula* Pilg.** PERU. Huancavelica: Huilca-orocon, 5 km NW of Conayca, 16 April 1955, Tovar O. 2431 (US). Lima: Salta Cuna, March 1943, Soukup J. 1944 (US); Huarochiri, 107 km W of Lima on Hwy 20 towards La Oroya [Oroya] at Chicla, 5 April 1997, Peterson P. M. & Tovar O. 14019 (MO). ***Festuca jaliscana* E.B. Alexeev.** MEXICO. Jalisco: NE slopes of the Nevado de Colima, below Canoa de Leoncito, Barranca de la Rosa, 10 October 1952, McVaugh R. 13409 (US, holotype). ***Festuca lugens* (E. Fourn.) Hitchc. ex Hern.-Xol.** MEXICO. Oaxaca: Cumbre de Estepa, September 1842,

Liebmann F. M. 6247, 502 (C, type). *Festuca quadridentata* **Kunth**. ECUADOR. Cañar: S of El Tambo ca 1.5 - 3 km along road to Carshao, 10 June 1999, Laegaard S. 20287 & Sklenář P. (AAU). Chimborazo: Near Alao, along Río Alao, 21 September 1985, Laegaard S. 55290 (AAU); *idem*, Llactapamba, 1 March 1944, Acosta-Solis M. 7581 (US). Chimborazo/Morona Santiago: Hda. Huargualla - Hda. San Eduardo, way to NP Sangay, 20 July 1999 (AAU). *Festuca steinbachii* **E.B. Alexeev**. BOLIVIA. Cochabamba, Cejawald bei "La Aduana", 7 March 1929, Steinbach J. 9533 (LIL, isotype). *Festuca superba* **Parodi ex Tūrpe**. ARGENTINA. Jujuy: Lagunas de Yala, 30 January 1975, Zuloaga F. O. 383 & Deginani N. B. (SI); *idem*, 16 February 1987, Nicora E. 8740, Gómez-Sosa E., Palasi C., Pensiero J. & Rúgolo Z. (SI); *idem*, 16 January 1988, Zuloaga F. O. 3545 & N. B. Deginani (SI); slope of Yala, 29 March 1992, Cabrera A. L. 34886, Deginani A. M., Tur N. & Ulibarri E. (SI); quebrada de Yala, 19 January 1976, Cabrera A. L. 27380, S. Arroyo, N. Bacigalupo, E. Nicora, E. Ulibarri (SI); from San Salvador de Jujuy to Termas de Reyes, 05 March 1987, Zuloaga F. O. 3008, Morrone O. (SI); Termas de Reyes, 5 February 1943, Parodi L. R. 14552 (BAA); *idem*, 07 January 1968, Cabrera A. L. 18879, Deferrari A. M., Frangi J., Marrone M. T., Petriella B. (SI); *idem*, entrada al Balneario, 25 November 2008, Catalan P. 360.08 & Müller J. (UZ); Yala, Laguna Rodeo, 24 November 2008, Catalan P. 356.08 & Müller J. (UZ). *Festuca tancitaroensis* **Gonz.-Led. & S.D. Koch**. MEXICO. Michoacan: Mt. Tancitaro, 25 July 1941, Leavenworth W.C. & Leavenworth Mrs. W.C. 1213 (US, holotype). *Festuca urubambana* **Stančík**. PERU. Cuzco: Urubamba, lower end of Quebrada Pumahuanca, a deep side-valley of R. Urubamba ca. 2-4km NW of Urubamba, 31 December 1962, Iltis H. H.-C. M. 853 & Ugent D. – V. (K, holotype). *Festuca valdesii* **Gonz.-Led. & S.D. Koch**. MEXICO. Coahuila de Zaragoza: Arteaga, Sierra Zapalinamé, 19 May 1990, Hinton G.S. 20278 & al. (IEB, isotype). *Festuca woodii* **Stančík**. COLOMBIA. Boyaca: Sierra Nevada del Cocuy, hacienda La Esperanza, 29 December 1985, Wood J. 5254 (COL, holotype). *Festuca venezuelana* **Stančík**. VENEZUELA. Tachira: La Grita, La Negra, cross of the two roads to La grita and Pogonero, 10-11 November 2000, Stančík D. 4262 (AAU, isotype).

**Supplementary Table S1.** Genome proportion of repeats estimated by Repeat Explorer2 for individual Loliinae samples (estimated percentages per holoploid genome, 1C). Values in bold correspond to new data generated in this study.

| Loliinae taxon               | Class I/LTR/Ty1_copia |        |        |       |      |      |      |      | Class I/LTR/Ty3_gypsy |      |      |       |        |       |      |             | Class II/TIR |         |        |       |      |      |           |      | Ty1_copia | Ty3_gypsy | LTR  | LINE | satellite | rDNA (5S-45S) | Mobile element | Repeat (conflicting evidences) | Unclassified (No evidence) | Total |
|------------------------------|-----------------------|--------|--------|-------|------|------|------|------|-----------------------|------|------|-------|--------|-------|------|-------------|--------------|---------|--------|-------|------|------|-----------|------|-----------|-----------|------|------|-----------|---------------|----------------|--------------------------------|----------------------------|-------|
|                              | Ale                   | Angela | Ikeros | Ivana | SIRE | TAR  | Tork | OTA  | Athila                | Tat  | Ogre | Tekay | Retand | Reina | CRM  | chromovirus | MuDR_        | Mutator | EnSpm_ | CACTA | hAT  | PIF_ | Harbinger |      |           |           |      |      |           |               |                |                                |                            |       |
| Broad Leaved (BL) Loliinae   |                       |        |        |       |      |      |      |      |                       |      |      |       |        |       |      |             |              |         |        |       |      |      |           |      |           |           |      |      |           |               |                |                                |                            |       |
| <i>Festuca asperella</i>     | 0.00                  | 9.47   | 0.00   | 0.21  | 1.01 | 0.42 | 0.01 | 0.00 | 0.06                  | 0.00 | 0.00 | 3.93  | 6.14   | 0.00  | 0.21 | 0.02        | 0.24         | 0.49    | 0.00   | 0.00  | 0.79 | 0.00 | 8.16      | 0.00 | 0.27      | 0.19      | 0.00 | 0.00 | 20.38     | 52.000        |                |                                |                            |       |
| <i>Festuca breviglumis</i>   | 0.00                  | 16.98  | 0.00   | 0.71  | 0.41 | 0.34 | 0.00 | 0.00 | 0.00                  | 0.00 | 0.01 | 2.68  | 18.65  | 0.00  | 0.02 | 0.00        | 0.20         | 0.65    | 0.00   | 0.00  | 0.00 | 0.00 | 5.59      | 0.00 | 1.37      | 0.02      | 0.00 | 1.51 | 6.47      | 55.610        |                |                                |                            |       |
| <i>Festuca chiriquensis</i>  | 0.00                  | 38.63  | 0.00   | 0.30  | 0.86 | 0.27 | 0.09 | 0.00 | 0.53                  | 0.00 | 0.00 | 6.36  | 6.76   | 0.00  | 0.22 | 0.00        | 0.32         | 0.58    | 0.02   | 0.00  | 0.00 | 0.40 | 6.82      | 0.00 | 0.64      | 0.15      | 0.00 | 0.02 | 4.53      | 67.500        |                |                                |                            |       |
| <i>Festuca caldasii</i>      | 0.03                  | 27.45  | 0.00   | 0.33  | 0.82 | 0.48 | 0.02 | 0.00 | 0.26                  | 0.00 | 0.13 | 7.32  | 6.03   | 0.00  | 0.17 | 0.00        | 0.11         | 0.49    | 0.00   | 0.00  | 0.00 | 0.00 | 9.64      | 0.00 | 0.88      | 0.06      | 0.00 | 0.00 | 7.40      | 61.597        |                |                                |                            |       |
| <i>Festuca superba</i>       | 0.03                  | 21.07  | 0.00   | 0.90  | 0.68 | 0.49 | 0.01 | 0.00 | 0.00                  | 0.00 | 0.01 | 1.54  | 20.31  | 0.00  | 0.05 | 0.00        | 0.51         | 0.92    | 0.00   | 0.00  | 0.00 | 0.00 | 11.01     | 0.00 | 1.40      | 0.26      | 0.00 | 0.00 | 5.71      | 64.879        |                |                                |                            |       |
| <i>Festuca venezuelana</i>   | 0.00                  | 15.44  | 0.00   | 0.14  | 0.38 | 0.15 | 0.00 | 0.00 | 0.00                  | 0.00 | 0.00 | 4.94  | 4.85   | 0.00  | 0.06 | 0.00        | 0.05         | 0.09    | 0.00   | 0.00  | 0.31 | 0.00 | 10.50     | 0.00 | 0.90      | 0.25      | 0.00 | 0.00 | 26.22     | 64.280        |                |                                |                            |       |
| <i>Festuca dichoclada</i>    | 0.00                  | 7.89   | 0.00   | 0.59  | 1.62 | 0.71 | 0.03 | 0.00 | 0.04                  | 0.00 | 0.00 | 1.30  | 13.81  | 0.00  | 2.01 | 0.00        | 1.73         | 2.70    | 0.05   | 0.00  | 0.00 | 0.00 | 7.12      | 0.00 | 1.61      | 0.15      | 0.00 | 1.16 | 8.75      | 51.270        |                |                                |                            |       |
| <i>Festuca horridula</i>     | 0.00                  | 8.97   | 0.01   | 0.80  | 1.06 | 0.19 | 0.00 | 0.00 | 0.33                  | 0.00 | 0.28 | 2.89  | 13.92  | 0.00  | 1.83 | 0.00        | 1.27         | 0.72    | 0.02   | 0.05  | 0.05 | 0.00 | 8.02      | 0.05 | 3.51      | 0.35      | 0.00 | 0.02 | 6.83      | 51.170        |                |                                |                            |       |
| <i>Festuca quadridentata</i> | 0.00                  | 8.56   | 0.01   | 0.35  | 1.64 | 0.25 | 0.00 | 0.00 | 0.43                  | 0.00 | 0.10 | 1.75  | 5.83   | 0.00  | 1.88 | 0.00        | 0.10         | 0.69    | 0.00   | 0.00  | 0.00 | 0.00 | 2.37      | 0.09 | 2.41      | 0.27      | 0.00 | 0.00 | 22.24     | 48.970        |                |                                |                            |       |
| <i>Festuca amplissima</i>    | 0.00                  | 12.43  | 0.05   | 0.11  | 3.04 | 0.71 | 0.23 | 0.00 | 0.26                  | 0.00 | 0.02 | 2.05  | 7.87   | 0.00  | 0.67 | 0.00        | 0.79         | 1.54    | 0.00   | 0.00  | 0.00 | 0.00 | 6.89      | 0.16 | 2.72      | 0.12      | 0.00 | 0.00 | 12.58     | 52.254        |                |                                |                            |       |
| <i>Festuca valdesii</i>      | 0.00                  | 11.38  | 0.00   | 0.75  | 1.82 | 0.66 | 0.06 | 0.00 | 0.22                  | 0.00 | 0.00 | 1.39  | 9.65   | 0.00  | 3.40 | 0.00        | 0.24         | 0.68    | 0.00   | 0.00  | 0.00 | 0.00 | 11.07     | 0.04 | 2.94      | 0.41      | 0.00 | 1.04 | 10.17     | 55.920        |                |                                |                            |       |
| <i>Festuca argentina</i>     | 0.00                  | 6.77   | 0.04   | 0.41  | 8.84 | 0.70 | 0.05 | 0.00 | 0.43                  | 0.00 | 0.20 | 3.23  | 16.33  | 0.00  | 1.41 | 0.00        | 0.75         | 2.33    | 0.00   | 0.00  | 0.00 | 0.00 | 4.67      | 0.10 | 2.66      | 0.29      | 0.00 | 1.45 | 6.04      | 56.700        |                |                                |                            |       |
| <i>Festuca kingii</i>        | 0.11                  | 6.72   | 0.01   | 0.37  | 1.42 | 0.26 | 0.00 | 0.00 | 0.04                  | 0.00 | 0.00 | 0.65  | 12.77  | 0.00  | 0.27 | 0.00        | 0.27         | 0.63    | 0.00   | 0.00  | 0.00 | 0.00 | 6.37      | 0.01 | 4.72      | 0.45      | 0.00 | 0.00 | 18.67     | 53.630        |                |                                |                            |       |
| <i>Festuca spectabilis</i>   | 0.00                  | 8.94   | 0.00   | 0.00  | 2.47 | 0.73 | 0.10 | 0.00 | 0.07                  | 0.00 | 0.12 | 3.54  | 10.48  | 0.00  | 2.38 | 0.00        | 0.35         | 4.13    | 0.00   | 0.05  | 0.00 | 0.00 | 7.32      | 0.20 | 2.04      | 0.77      | 0.00 | 0.00 | 7.71      | 51.406        |                |                                |                            |       |
| <i>Festuca africana</i>      | 0.00                  | 8.42   | 0.00   | 0.00  | 0.46 | 0.06 | 0.00 | 0.00 | 0.30                  | 0.00 | 4.63 | 4.75  | 1.32   | 0.00  | 0.14 | 0.00        | 0.13         | 1.14    | 0.00   | 0.00  | 0.00 | 0.00 | 5.74      | 0.00 | 1.70      | 0.04      | 0.00 | 0.00 | 32.26     | 61.096        |                |                                |                            |       |
| <i>Festuca mekiste</i>       | 0.00                  | 8.79   | 0.00   | 0.01  | 3.08 | 0.24 | 0.00 | 0.00 | 2.77                  | 0.00 | 7.92 | 11.14 | 1.91   | 0.00  | 0.35 | 0.00        | 0.27         | 2.86    | 0.00   | 0.00  | 0.00 | 0.00 | 2.68      | 0.00 | 3.01      | 0.03      | 0.00 | 0.00 | 6.50      | 51.573        |                |                                |                            |       |
| <i>Festuca durandoi</i>      | 0.00                  | 6.81   | 0.00   | 0.00  | 3.60 | 0.47 | 0.00 | 0.00 | 0.17                  | 0.00 | 0.16 | 3.87  | 18.20  | 0.00  | 1.84 | 0.00        | 0.19         | 4.04    | 0.00   | 0.09  | 0.00 | 0.00 | 4.90      | 0.02 | 0.96      | 0.10      | 0.00 | 0.87 | 7.81      | 54.121        |                |                                |                            |       |
| <i>Festuca paniculata</i>    | 0.00                  | 7.51   | 0.00   | 0.00  | 3.75 | 0.43 | 0.02 | 0.00 | 0.45                  | 0.00 | 0.00 | 2.30  | 14.83  | 0.00  | 0.81 | 0.00        | 0.02         | 0.51    | 0.00   | 0.03  | 0.00 | 0.00 | 5.82      | 0.03 | 0.82      | 0.89      | 2.77 | 0.00 | 13.16     | 54.140        |                |                                |                            |       |
| <i>Festuca lasto</i>         | 0.00                  | 11.83  | 0.09   | 0.00  | 2.73 | 0.59 | 0.02 | 0.00 | 3.42                  | 0.00 | 0.00 | 8.51  | 6.85   | 0.00  | 1.76 | 0.00        | 0.03         | 1.72    | 0.00   | 0.00  | 0.00 | 0.00 | 1.76      | 0.01 | 0.84      | 0.17      | 0.00 | 0.00 | 14.11     | 54.461        |                |                                |                            |       |
| <i>Festuca triflora</i>      | 0.00                  | 15.24  | 0.00   | 0.00  | 1.34 | 0.33 | 0.14 | 0.00 | 5.98                  | 0.00 | 0.11 | 7.71  | 7.15   | 0.00  | 0.78 | 0.00        | 0.13         | 0.85    | 0.00   | 0.00  | 0.00 | 0.00 | 0.00      | 0.00 | 1.78      | 0.51      | 0.00 | 0.00 | 14.93     | 56.981        |                |                                |                            |       |

|                               |      |       |      |      |      |      |      |      |      |      |      |      |       |      |      |      |      |      |      |      |      |      |      |      |      |      |      |      |       |        |
|-------------------------------|------|-------|------|------|------|------|------|------|------|------|------|------|-------|------|------|------|------|------|------|------|------|------|------|------|------|------|------|------|-------|--------|
| <i>Festuca pratensis</i>      | 0.04 | 5.41  | 0.01 | 0.00 | 3.77 | 0.19 | 0.00 | 0.00 | 7.18 | 0.00 | 0.66 | 4.89 | 14.88 | 0.00 | 4.26 | 0.00 | 0.01 | 2.02 | 0.00 | 0.00 | 0.00 | 0.00 | 2.17 | 0.01 | 1.81 | 0.69 | 0.00 | 0.40 | 10.29 | 58.684 |
| <i>Festuca atlantigena</i>    | 0.00 | 2.84  | 0.02 | 0.00 | 0.60 | 0.08 | 0.01 | 0.00 | 0.14 | 0.00 | 0.00 | 7.50 | 11.16 | 0.00 | 1.49 | 0.00 | 0.06 | 1.62 | 0.00 | 0.03 | 0.00 | 0.00 | 6.42 | 0.08 | 2.13 | 0.37 | 0.00 | 0.09 | 11.43 | 46.088 |
| <i>Festuca molokaiensis</i>   | 0.00 | 5.94  | 0.03 | 1.26 | 9.96 | 0.03 | 0.00 | 0.00 | 0.01 | 0.00 | 1.55 | 5.71 | 21.35 | 0.00 | 0.26 | 0.00 | 1.37 | 4.95 | 0.00 | 0.00 | 0.00 | 0.00 | 1.49 | 0.02 | 1.12 | 0.25 | 0.00 | 1.49 | 7.09  | 63.853 |
| Fine leaved (FL) Loliinae     |      |       |      |      |      |      |      |      |      |      |      |      |       |      |      |      |      |      |      |      |      |      |      |      |      |      |      |      |       |        |
| <i>Festuca fimbriata</i>      | 0.01 | 4.47  | 0.15 | 0.04 | 1.60 | 1.18 | 0.12 | 0.00 | 0.04 | 0.00 | 0.34 | 0.21 | 1.66  | 0.00 | 0.09 | 0.00 | 0.20 | 1.18 | 0.00 | 0.00 | 0.43 | 0.00 | 1.62 | 0.02 | 3.91 | 0.05 | 0.00 | 0.00 | 21.54 | 38.855 |
| <i>Festuca asplundii</i>      | 0.00 | 9.97  | 0.52 | 0.00 | 8.17 | 0.53 | 0.13 | 0.00 | 1.31 | 0.00 | 0.82 | 0.02 | 1.96  | 0.00 | 0.67 | 0.00 | 0.93 | 5.52 | 0.00 | 0.01 | 0.00 | 0.00 | 3.27 | 0.00 | 1.83 | 0.04 | 0.00 | 0.97 | 11.75 | 48.412 |
| <i>Festuca procera</i>        | 0.00 | 10.88 | 0.36 | 0.00 | 7.10 | 0.60 | 0.12 | 0.01 | 0.87 | 0.00 | 0.34 | 0.21 | 4.32  | 0.00 | 1.48 | 0.00 | 0.80 | 4.67 | 0.00 | 0.00 | 0.00 | 0.00 | 0.00 | 0.00 | 2.66 | 0.05 | 0.00 | 2.09 | 11.66 | 48.212 |
| <i>Festuca chimborazensis</i> | 0.00 | 10.89 | 0.06 | 0.02 | 6.98 | 0.67 | 0.00 | 0.01 | 1.06 | 0.00 | 0.06 | 0.00 | 4.17  | 0.00 | 1.16 | 0.00 | 0.65 | 5.04 | 0.00 | 0.09 | 0.00 | 0.00 | 2.15 | 0.00 | 4.09 | 0.30 | 0.00 | 1.07 | 8.99  | 47.449 |
| <i>Festuca holubii</i>        | 0.00 | 10.87 | 0.07 | 0.00 | 6.86 | 0.76 | 0.00 | 0.00 | 0.61 | 0.00 | 0.02 | 0.01 | 3.52  | 0.00 | 1.10 | 0.00 | 0.54 | 4.54 | 0.00 | 0.01 | 0.00 | 0.00 | 0.90 | 0.01 | 5.96 | 0.42 | 0.00 | 0.99 | 13.32 | 50.518 |
| <i>Festuca pampeana</i>       | 0.00 | 0.52  | 0.00 | 0.06 | 0.63 | 0.10 | 0.06 | 0.00 | 0.00 | 0.00 | 0.33 | 0.00 | 6.47  | 0.00 | 0.03 | 0.00 | 0.19 | 0.85 | 0.00 | 0.00 | 0.00 | 0.00 | 2.85 | 0.00 | 4.77 | 1.02 | 0.00 | 0.00 | 23.59 | 41.481 |
| <i>Festuca gracillima</i>     | 0.00 | 4.50  | 0.15 | 0.02 | 1.74 | 0.61 | 0.00 | 0.00 | 0.87 | 0.00 | 1.22 | 0.01 | 6.05  | 0.00 | 1.54 | 0.00 | 0.92 | 0.76 | 0.00 | 0.00 | 0.00 | 0.00 | 8.23 | 0.00 | 1.45 | 0.61 | 0.00 | 6.04 | 13.95 | 48.684 |
| <i>Festuca abyssinica</i>     | 0.00 | 3.65  | 0.00 | 0.07 | 0.96 | 0.08 | 0.00 | 0.00 | 0.15 | 0.00 | 1.85 | 1.78 | 3.83  | 0.00 | 0.34 | 0.00 | 0.41 | 1.56 | 0.00 | 0.00 | 0.00 | 0.00 | 3.45 | 0.00 | 4.93 | 0.31 | 0.00 | 0.00 | 26.92 | 50.267 |
| <i>Festuca rubra</i>          | 0.00 | 0.08  | 0.00 | 0.00 | 0.96 | 0.30 | 0.01 | 0.00 | 8.55 | 0.00 | 0.61 | 1.24 | 2.11  | 0.00 | 0.69 | 0.00 | 0.01 | 0.95 | 0.00 | 0.00 | 0.00 | 0.00 | 0.76 | 0.00 | 6.56 | 0.70 | 0.00 | 0.32 | 22.79 | 46.646 |
| <i>Festuca ovina</i>          | 0.03 | 0.26  | 0.02 | 0.00 | 3.16 | 0.33 | 0.00 | 0.00 | 7.18 | 0.00 | 0.59 | 2.04 | 4.26  | 0.00 | 1.04 | 0.00 | 0.00 | 2.01 | 0.00 | 0.01 | 0.00 | 0.00 | 2.75 | 0.03 | 5.22 | 0.28 | 0.00 | 7.10 | 12.28 | 48.550 |
| <i>Festuca capillifolia</i>   | 0.00 | 0.75  | 0.00 | 0.00 | 2.32 | 0.14 | 0.01 | 0.00 | 1.58 | 0.00 | 0.22 | 4.87 | 4.03  | 0.00 | 1.41 | 0.00 | 0.00 | 1.86 | 0.00 | 0.00 | 0.00 | 0.00 | 9.77 | 0.00 | 5.16 | 0.65 | 0.00 | 0.00 | 24.23 | 57.019 |
| <i>Vulpia ciliata</i>         | 0.14 | 3.81  | 0.00 | 0.00 | 0.78 | 0.49 | 0.16 | 0.01 | 0.22 | 0.00 | 0.08 | 0.56 | 16.79 | 0.00 | 0.86 | 0.00 | 0.11 | 1.60 | 0.00 | 0.00 | 0.00 | 0.00 | 8.45 | 0.33 | 2.76 | 0.70 | 0.00 | 2.33 | 11.74 | 51.766 |
| <i>Festuca gautieri</i>       | 0.00 | 4.85  | 0.04 | 0.11 | 4.41 | 0.41 | 0.00 | 0.00 | 0.14 | 0.00 | 0.21 | 1.25 | 13.15 | 0.00 | 1.09 | 0.00 | 0.21 | 2.14 | 0.00 | 0.04 | 0.00 | 0.00 | 7.35 | 0.02 | 1.35 | 0.86 | 0.00 | 0.00 | 10.71 | 48.340 |
